# Supplementary material
Source: PubMed Central journal article supplement (PMC9297005)

## Supporting Information

# Protective Role of Glutathione Against Peroxynitrite-Mediated DNA Damage During Acute Inflammation

Nabeel Ahmed<sup>‡</sup>, Anindita Chakrabarty<sup>‡</sup>, F. Peter Guengerich<sup>&</sup>, and Goutam Chowdhury<sup>\*†</sup>

<sup>‡</sup>*Department of Life Sciences, Shiv Nadar University, Greater Noida, UP 201314, India and*

<sup>&</sup>*Department of Biochemistry, Vanderbilt University School of Medicine, Nashville, Tennessee 37232-0146, United States*

**Figure S1.** Stability of GS-dG adduct. HPLC purified GS-dG adduct was incubated in 100 mM potassium phosphate buffer, pH 7.4 at 37 °C. Aliquots were removed at various time intervals and analyzed using LC-MS.

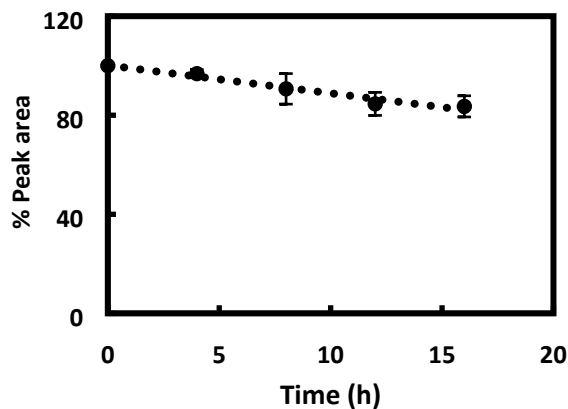

Supplement: NIHMS1820867-supplement-Supporting_Info.pdf [file NIHMS1820867-supplement-Supporting_Info.pdf]
